# Supplementary material for: The Role and Mechanism of Hydrogen-Rich Water in the Cucumis sativus Response to Chilling Stress
Source: MDPI journal article supplement (doi:10.3390/ijms24076702), 2023-04-04
Supplement: s1 [file s1]

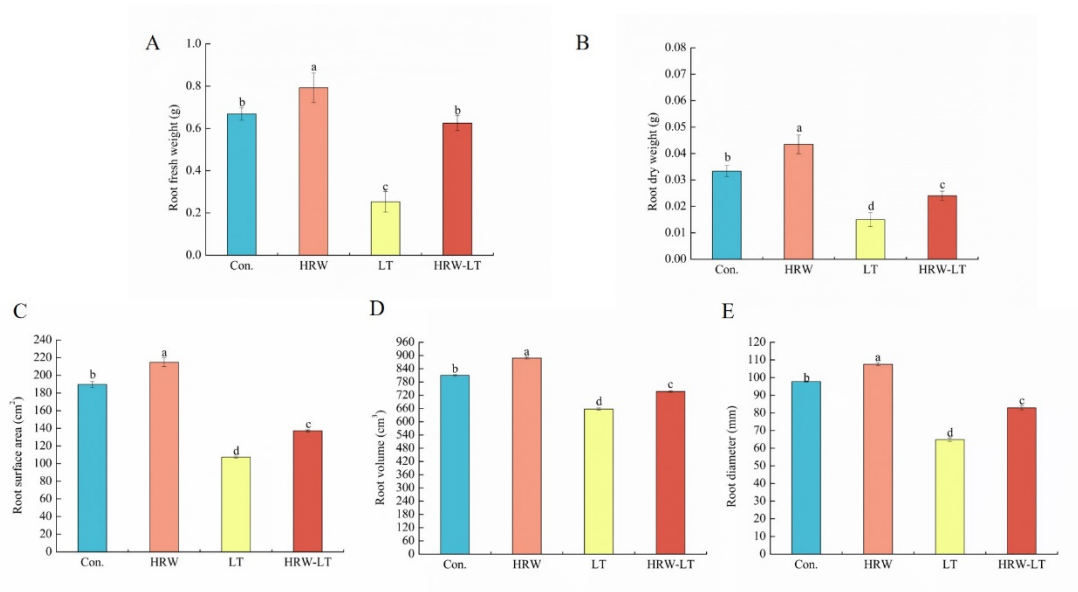

**Figure S1.** HRW increased cucumber root growth under chilling stress. (A) root fresh weight. (B) root dry weight. (C) root surface area. (D) root volume. (E) root diameter. Values are the means  $\pm$  SD,  $n = 9$  (number of samples). The different letters indicate a significant difference ( $p < 0.05$ ). These indicators were measured after 72 h of chilling stress.

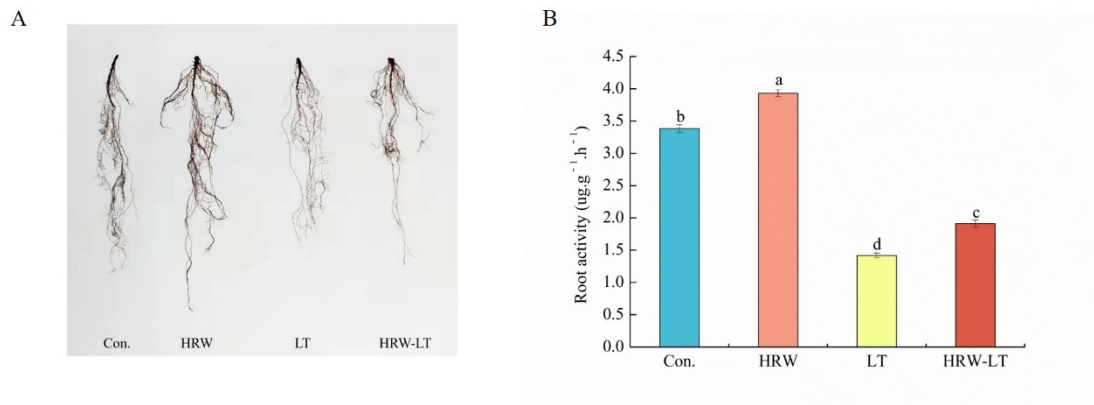

**Figure S2.** HRW enhanced cucumber root vitality under chilling stress. (A) root staining. (B) root vitality. Data were the mean  $\pm$  standard deviation of three biological replicates. The different letters indicate a significant difference ( $p < 0.05$ ). These indicators were measured after 72 h of chilling stress.

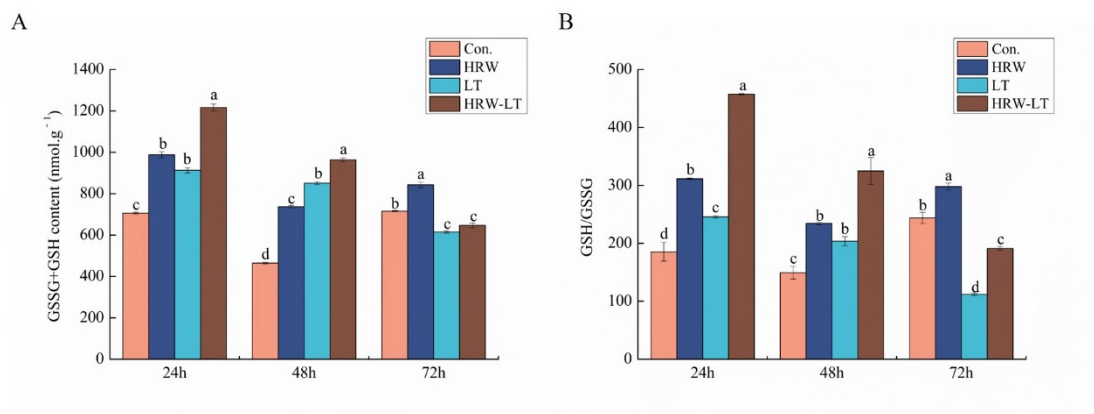

**Figure S3.** HRW effected cucumber GSH+GSSG content and GSH/GSSG under chilling stress. (A) GSH+GSSG content. (B) GSH/GSSG. Data were the mean  $\pm$  standard deviation of three biological replicates. The different letters indicate a significant difference ( $p < 0.05$ ).

**Table S1** The primers of qRT-PCR used in this study

| Analysis               | Primer name   | Sequence (5'-3')         |
|------------------------|---------------|--------------------------|
| qRT-PCR for Actin      | Actin-F       | TCGTGCTGGATTCTGGTG       |
|                        | Actin-R       | GGCAGTGGTGGTGAACAT       |
| qRT-PCR for <i>SOD</i> | <i>SOD</i> -F | CACAACCAATGGCTGCATGTCG   |
|                        | <i>SOD</i> -R | ATGGTGAAGTTAGCCTTGCCATC  |
| qRT-PCR for <i>CAT</i> | <i>CAT</i> -F | ACTTTAAGGAGCCCGGAGAGAG   |
|                        | <i>CAT</i> -R | CGGATAAATCGTTCCTGCCTGTC  |
| qRT-PCR for <i>POD</i> | <i>POD</i> -F | ATCTTGTTGCTCTTTCAGGTAGCC |
|                        | <i>POD</i> -R | AGACGTTGCCTGAAGCTAGTGC   |
| qRT-PCR for <i>GR</i>  | <i>GR</i> -F  | GGCGCAGGCCTAATACAAAGAAC  |
|                        | <i>GR</i> -R  | TCTCCAACAGCCCAAATTGAAGG  |
| qRT-PCR for <i>APX</i> | <i>APX</i> -F | GGCTATTGGAGCCGATCAAGGAAC |
|                        | <i>APX</i> -R | CAGCAACAACACCAGCCAAGT    |

**Table S2** Full names of some nouns

| abbreviation                  | full name                          |
|-------------------------------|------------------------------------|
| Pn                            | photosynthetic rate                |
| Tr                            | transpiration rate                 |
| Gs                            | stomatal conductance               |
| Ci                            | carbon dioxide                     |
| F0                            | initial fluorescence               |
| Fm                            | maximum fluorescence               |
| Fv/Fm                         | maximum photochemical efficiency   |
| REC                           | relative electrolytic conductivity |
| MDA                           | malondialdehyde                    |
| H <sub>2</sub> O <sub>2</sub> | hydrogen peroxide                  |
| O <sub>2</sub> <sup>-</sup>   | standard oxygen                    |
| DAB                           | diaminobenzidine                   |
| NBT                           | nitrotetrazolium blue chloride     |
| SOD                           | superoxide dismutase               |
| CAT                           | catalase                           |
| POD                           | peroxidase                         |
| APX                           | ascorbate peroxidase               |
| GR                            | glutathione reductase              |
| GSH                           | glutathione                        |
| GSSG                          | glutathiol                         |
| ASA                           | ascorbic acid                      |
